# Supplementary material for: Survey of Pretreatment HIV Drug Resistance and The Genetic Transmission Networks Among HIV-Infected Individuals in Southwestern China, 2014-2020
Source: Research Square preprint supplement (doi:10.21203/rs.3.rs-676872/v1), 2021-07-19
Supplement: Supplementary file 1 [file 052477a8c48aa44d41548c2f.docx]

**Supplementary Table 1** The trend of pretreatment HIV drug resistance among HIV-infected individuals in southwestern China, 2014-2020

| Year of newly diagnosed HIV-infected individuals | Number | PDR, N (%) | M-H *χ²* | *P* |
| --- | --- | --- | --- | --- |
| Total | 3262 | 194 (6.0) | 1.00 | 0.32 |
| 2014 | 289 | 17 (5.9) |  |  |
| 2015 | 526 | 27 (5.1) |  |  |
| 2016 | 593 | 33 (5.6) |  |  |
| 2017 | 486 | 28 (5.8) |  |  |
| 2018 | 488 | 34 (7.0) |  |  |
| 2019 | 653 | 39 (6.0) |  |  |
| 2020a | 227 | 16 (7.1) |  |  |

a The diagnosis period is from January 1, 2020 to June 30, 2020.

Data are presented as N (%). Mantel-Haenszel (M-H) χ²linear trend test for the trend of pretreatment HIV drug resistance among newly diagnosed HIV-infected individuals over time.

**Supplementary Table 2** Clustering rate difference between HIV-infected individuals with and without PDR in the genetic transmission networks

|  | Number | Clustered, N | Percentage, % (*95% CI*) | *χ²* | *P* |
| --- | --- | --- | --- | --- | --- |
| Total | 3262 | 1429 |  | 15.03 | <0.01 |
| PDR | 194 | 59 | 30.4 (23.9-36.9) |  |  |
| No PDR | 3068 | 1370 | 44.7 (42.9-46.4) |  |  |

**Supplementary Table 3** Degrees difference between HIV-infected individuals with and without PDR in the genetic transmission networks

|  | PDR (n=59) | No PDR (n=1370) | *Z* | *P* |
| --- | --- | --- | --- | --- |
| Degree, Median (IQR) | 2.00 (1, 6) | 2.00 (1, 7) | -0.94 | 0.35 |
